# Supplementary material for: A High-Throughput Fluorescence Polarization-Based Assay for the SH2 Domain of STAT4
Source: MDPI journal article supplement (doi:10.3390/mps5060093), 2022-11-23
Supplement: s1 [file s1]

**Figure S1**

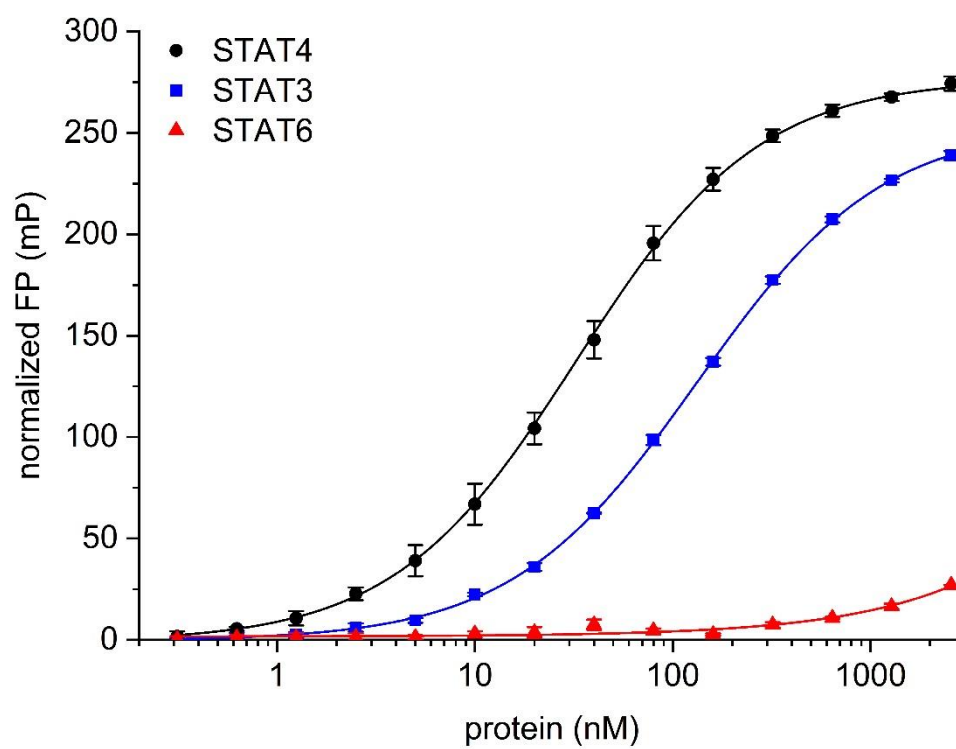

**Figure S1.** Binding of 5-CF-GpYLPQNID to STAT4, STAT3 and STAT6 in fluorescence polarization assays.
